# Supplementary material
Source: publisher figshare collection journal article supplement (https://future-science-group.figshare.com/ndownloader/files/31193875)
Supplement: Supplementary file 1 [file 31193875]

S1 Table. Univariate analysis of overall survival

| Variable | n | Death  (%) | 1 year survival(%) | 2 year survival(%) | 3 year survival(%) | Chisq-value | P-value |
| --- | --- | --- | --- | --- | --- | --- | --- |
| Age (year) |  |  |  |  |  | 11.387 | 0.001 |
| ≤60 | 981 | 52.5 | 73.6 | 58.8 | 48.8 |  |  |
| ＞60 | 340 | 61.2 | 68.8 | 51.7 | 36.9 |  |  |
| Sex |  |  |  |  |  | 0.019 | 0.890 |
| Female | 163 | 54.0 | 77.9 | 61.5 | 52.4 |  |  |
| Male | 1158 | 54.8 | 71.5 | 56.4 | 45.1 |  |  |
| Cirrhosis |  |  |  |  |  | 0.276 | 0.600 |
| Yes | 227 | 57.7 | 67.1 | 55.8 | 44.4 |  |  |
| No | 1094 | 54.1 | 73.4 | 57.3 | 46.3 |  |  |
| Child_Pugh |  |  |  |  |  | 0.001 | 0.970 |
| A | 61 | 59.0 | 62.3 | 59.0 | 41.6 |  |  |
| B | 1260 | 54.5 | 72.8 | 56.9 | 46.2 |  |  |
| Tumour_diameter (cm) | | |  |  |  | 17.515 | <0.001 |
| ≤10 | 406 | 45.8 | 77.3 | 64.5 | 55.3 |  |  |
| ＞10 | 915 | 58.7 | 70.2 | 53.8 | 42.4 |  |  |
| BCLC |  |  |  |  |  | 144.659 | <0.001 |
| A | 360 | 39.2 | 92.2 | 81.8 | 69.0 |  |  |
| B | 647 | 56.4 | 72.0 | 54.8 | 43.3 |  |  |
| C | 314 | 39.1 | 50.2 | 34.8 | 27.5 |  |  |
| Tumour_capsule |  |  |  |  |  | 83.703 | <0.001 |
| Complete | 553 | 65.1 | 62.4 | 45.7 | 35.0 |  |  |
| Imcompelte | 537 | 40.8 | 83.8 | 73.8 | 62.3 |  |  |
| Absence | 231 | 62.3 | 69.9 | 48.0 | 36.0 |  |  |
| Macrovascular |  |  |  |  |  | 111.582 | <0.001 |
| No | 914 | 47.2 | 79.6 | 65.0 | 52.7 |  |  |
| Yes | 407 | 71.7 | 56.4 | 39.5 | 31.1 |  |  |
| Leukocyte(×109/L) |  |  |  |  |  | 7.603 | 0.006 |
| ≤4.48 | 151 | 49.0 | 80.8 | 67.4 | 56.5 |  |  |
| ＞4.48 | 1170 | 55.5 | 71.2 | 55.7 | 44.5 |  |  |
| RBC (×1012/L) |  |  |  |  |  | 5.535 | 0.019 |
| ≤3.55 | 166 | 60.8 | 78.0 | 57.4 | 36.9 |  |  |
| ＞3.55 | 1155 | 53.9 | 71.5 | 57.0 | 47.0 |  |  |
| Lymphocyte(×109/L) | | |  |  |  | 7.175 | 0.007 |
| ≤2.08 | 985 | 55.4 | 70.4 | 53.6 | 43.7 |  |  |
| ＞2.08 | 336 | 52.7 | 78.1 | 66.9 | 52.8 |  |  |
| Neutrophil(×109/L) | |  |  |  |  | 2.428 | 0.119 |
| ≤7.25 | 1140 | 55.1 | 72.6 | 57.8 | 46.9 |  |  |
| ＞7.25 | 181 | 52.5 | 70.6 | 51.7 | 39.3 |  |  |
| Platelet (×103/uL) | |  |  |  |  | 9.664 | 0.002 |
| ≤204 | 776 | 52.2 | 75.7 | 59.8 | 47.4 |  |  |
| ＞204 | 545 | 58.3 | 67.5 | 53.2 | 44.0 |  |  |
| NLR |  |  |  |  |  | 12.891 | <0.001 |
| ≤1.45 | 210 | 47.6 | 80.3 | 69.8 | 60.0 |  |  |
| ＞1.45 | 1111 | 56.1 | 70.8 | 54.6 | 43.2 |  |  |
| SII |  |  |  |  |  | 29.161 | <0.001 |
| ≤390.82 | 537 | 49.2 | 80.0 | 65.4 | 53.8 |  |  |
| ＞390.82 | 784 | 58.5 | 67.1 | 51.3 | 40.5 |  |  |
| PLR |  |  |  |  |  | 16.982 | <0.001 |
| ≤91.36 | 457 | 50.3 | 80.6 | 64.5 | 52.6 |  |  |
| ＞91.36 | 864 | 57.1 | 67.9 | 53.0 | 43.4 |  |  |
| APRI |  |  |  |  |  | 3.001 | 0.083 |
| ≤0.19 | 186 | 59.1 | 72.4 | 53.2 | 39.1 |  |  |
| ＞0.19 | 1135 | 54.0 | 72.3 | 57.7 | 47.0 |  |  |
| ANRI |  |  |  |  |  | 5.136 | 0.023 |
| ≤10.08 | 616 | 49.2 | 75.5 | 60.6 | 47.8 |  |  |
| ＞10.08 | 705 | 59.6 | 69.5 | 54.0 | 44.3 |  |  |
| ALRI |  |  |  |  |  | 34.605 | <0.001 |
| ≤22.91 | 40.7 | 46.8 | 79.7 | 68.0 | 57.4 |  |  |
| ＞22.91 | 59.3 | 60.2 | 67.2 | 49.5 | 39.5 |  |  |
| PNI |  |  |  |  |  | 12.780 | <0.001 |
| ≤49.55 | 714 | 60.6 | 68.9 | 52.5 | 40.9 |  |  |
| ＞49.55 | 607 | 47.7 | 76.4 | 62.6 | 52.5 |  |  |
| PT (s) |  |  |  |  |  | 0.018 | 0.892 |
| ≤11.7 | 253 | 60.5 | 73.9 | 60.3 | 47.9 |  |  |
| ＞11.7 | 1068 | 53.4 | 72.0 | 56.2 | 45.5 |  |  |
| Albumin (g/dL) |  |  |  |  |  | 7.234 | 0.007 |
| ≤42.8 | 941 | 59.3 | 70.3 | 54.9 | 43.5 |  |  |
| ＞42.8 | 380 | 43.4 | 77.4 | 62.6 | 53.3 |  |  |
| AST(U/L) |  |  |  |  |  | 43.844 | <0.001 |
| ≤53 | 871 | 49.0 | 77.3 | 63.6 | 51.8 |  |  |
| ＞53 | 450 | 65.8 | 62.7 | 44.8 | 35.1 |  |  |
| ALT(U/L) |  |  |  |  |  | 0.271 | 0.603 |
| ≤34 | 543 | 49.9 | 73.1 | 58.9 | 46.1 |  |  |
| ＞34 | 778 | 58.1 | 71.8 | 55.9 | 45.8 |  |  |
| DBIL(μmol/L) |  |  |  |  |  | 0.065 | 0.798 |
| ≤7 | 1108 | 55.0 | 72.2 | 56.7 | 46.1 |  |  |
| ＞7 | 213 | 53.5 | 72.9 | 58.9 | 44.2 |  |  |
| TBIL(umol/L) |  |  |  |  |  | 4.649 | 0.031 |
| ≤10.1 | 478 | 54.6 | 68.7 | 51.6 | 42.8 |  |  |
| ＞10.1 | 843 | 54.8 | 74.4 | 61.0 | 47.8 |  |  |
| AFP(ng/mL) |  |  |  |  |  | 30.949 | <0.001 |
| ≤400 | 810 | 51.2 | 77.8 | 62.9 | 51.3 |  |  |
| ＞400 | 511 | 60.3 | 63.7 | 47.8 | 37.4 |  |  |

BCLC, Barcelona Clinic Liver Cancer; RBC, red blood corpuscle; AST, aspartate amino transferase; ALT, alanine transaminase; NLR, neutrophil to lymphocyte ratio; SII, systemic immune-inflammation index; PLR, platelet to lymphocyte ratio; APRI, AST to platelet ratio index; ANRI, AST to neutrophil ratio index; ALRI, AST to lymphocyte ratio index; PNI, prognostic nutritional index; PT, prothrombin time; DBIL, direct bilirubin; TBIL, total bilirubin; AFP, α-fetoprotein.
